# Supplementary material for: Repo-Man recruits PP1γ to chromatin and is essential for cell viability
Source: PubMed Central journal article supplement — J Cell Biol. 2006 Feb 27;172(5):679–92. doi: 10.1083/jcb.200508154 (PMC2063701; doi:10.1083/jcb.200508154), 2006-02-27
Supplement: jcellbiol_jcb.200508154_12.pdf [file jcellbiol_jcb.200508154_12.pdf]

Tuesday, June 28, 2005 8:57 PM

|      |                                                                                 |         |
|------|---------------------------------------------------------------------------------|---------|
| 797  | L I E N T K E S K S Q S E D L G R K P - - - - - M E S S S V V S C R - -         | Human   |
| 773  | L I N N V K E S K R P S A G L R R N S - - - - - I K G R S G T G M R G G         | Dog     |
| 616  | - Y P N Q K D T D V H E I L Q R T E C P P K R - - - - - S S R S R               | Chicken |
| 773  | L I E N T K E S T S H S E N A G R K C - - - - - A E N G S T A S G R - -         | Rat     |
| 614  | L I Q N I K E P A S H S E N V G R K C - - - - - A G N G S P G S G R - -         | Mouse   |
| 906  | F D L Q P E N P Q E D S S T N S S S S L P D P V L F S A I E T V D A K K C R R S | Xenopus |
| 826  | D R K D R R R S M C Y S D G R S L H L E K N G N H T P S S S V - - - G S S V E I | Human   |
| 804  | E K Q H R R H S S C Y S D G Q S L Y L E E N G N H E S P Y L A - - - S S S V E I | Dog     |
| 643  | P P R R S S S I V Y I P P I E K S H F E T T G D D L Q V S S F - - - - D I E E   | Chicken |
| 802  | E R K W R R H T M Y C - E G Q S S Y L D Q N R N P A S S C S G - - - E N S V G I | Rat     |
| 643  | E R K W R R R T V C C - G G Q S S Y L E Q N G N P A S S C S G - - - E N F V E I | Mouse   |
| 946  | F R N H R R S T T L S V G S I E G S A E K S M Q G D P P A A S L C L E D K L D V | Xenopus |
| 863  | S L E N S E L - F K D L S D A I E Q T F O R R N S E T K V R R S T R L Q K D L E | Human   |
| 841  | G L E N S E L - Y K D L S D S I E Q T F O R T N S E T K V R R S T R L R K D L E | Dog     |
| 678  | V L S A P Q L K S N S L K K P L R R K S S M S S E T S Q V R R S M R L Q K D A E | Chicken |
| 838  | G L G N S Q L - I E E L S N T I E Q S F O R P R G K S K V R R S T R L Q K D L E | Rat     |
| 679  | S L E S V Q L - I E E L S N T I E Q S F O R T S S K T K V R R S T R L Q R D L E | Mouse   |
| 986  | C K G D E D F - - - S I E D A L K S N F P - - - S E K K V R R S M R L R R D S G | Xenopus |
| 902  | N E G L V W I S L P L P S T S - - - Q K A K R R - T I C T F D S S G F E S M S P | Human   |
| 880  | D E G L V W I S L P F P S T S C T S Q K T K R R - T I C T V D S R G F G G L S L | Dog     |
| 718  | I E G L A W I E V - - - - T S D I L Q N P S L L A P A C R T R R K I S T S V L T | Chicken |
| 877  | N T G L V W - - - - L S P S P S T F R K T K R R M T I C T L D S R G F E S T S S | Rat     |
| 718  | N T G L V W - - - - L S P S P S T L Q K P R R R M T I C T L D S R G F E C P S S | Mouse   |
| 1020 | V V G L S W V Q - - - - - E E K R K E T G R R K S I C M - - - - - - - - -       | Xenopus |
| 938  | I K E T V S S R Q K P Q M A P P V S D P E N S Q G P A A G S S D E P G K R R K S | Human   |
| 919  | S K E T V S S G Q K P S M P F P V S G K E N R E G F A A A S S S L P G K R R K S | Dog     |
| 754  | E S E N I H H R E E N L I Q F A A S G K E N N E S V H V A G G P - C R R R R K S | Chicken |
| 913  | K E E T L S S G Q N P G P L P S I S G S E S Q - - - G V G S S E L P R K R R K S | Rat     |
| 754  | K E E T I S S G Q N P G P L P A V S G S E S Q - - - G V G S S A L P R K R R - S | Mouse   |
| 1043 | - - S T V S Q M E T S Q P L L K E Q I P S P T T E N E P V A S I A K K S R R R T | Xenopus |
| 978  | F C I S T L A N T K - A T S Q F K G Y R R R S S L N G K G E S S L T A L E R I E | Human   |
| 959  | V C T S V L A N T R D T T T Q A K C Y K R R T S L S Q K G E S S P K D F Q R I E | Dog     |
| 793  | S C V S T P Q E T R - - - - - - - - - - - - - - - - - - - - - - - - -           | Chicken |
| 950  | F C L S A L S D G - N S M T Q L P H F K R K P S L K - K G E G - - - - - - -     | Rat     |
| 790  | L C G S T L T D A - N S A T Q P P D C K R K P S L K - - G E S - - - - - - -     | Mouse   |
| 1081 | L C T S T L - - - - H E A T S V S D F T W S D S - - - T S S C N T L S N S K A E | Xenopus |
| 1017 | - - - - - - - - - - - - - - - - - - - - - - - - - - - - - - - -                 | Human   |
| 999  | P V Q E L K Q V S G L S G I V A Q D G K T A S H V E L S G G I T W V V Q T A K P | Dog     |
| 803  | - - - - - - - - - - - - - - - - - - - - - - - - - - - - - - - -                 | Chicken |
| 979  | - - - - - - - - - - - - - - - - - - - - - - - - - - - - - - - -                 | Rat     |
| 818  | - - - - - - - - - - - - - - - - - - - - - - - - - - - - - - - -                 | Mouse   |
| 1114 | P L H G R K E - - - - - - - - - - - - - - - - - - - - - - - - - - -             | Xenopus |
| 1017 | - - - - - - - - - - - - - - - - - - - - - - - - - - - - - - - -                 | Human   |
| 1039 | C K G Y Q C R R K R I E F P L F L G T S S R R R M F M I D E V T P I Q Q I A H L | Dog     |
| 807  | - - - - - - - - - - - - - - - - - - - - - - - - - - - - - - - -                 | Chicken |
| 979  | - - - - - - - - - - - - - - - - - - - - - - - - - - - - - - - -                 | Rat     |
| 818  | - - - - - - - - - - - - - - - - - - - - - - - - - - - - - - - -                 | Mouse   |
| 1121 | - - - - E C K P A I T N S P S F L A L P C Q H K - - - - - - - - - - - - -       | Xenopus |
